# Supplementary material for: The effects of the Green-Mediterranean diet on cardiometabolic health are linked to gut microbiome modifications: a randomized controlled trial
Source: PubMed Central journal article supplement (PMC8908597; doi:10.1186/s13073-022-01015-z), 2022-03-10

# Flow Diagram of the DIRECT-PLUS trial

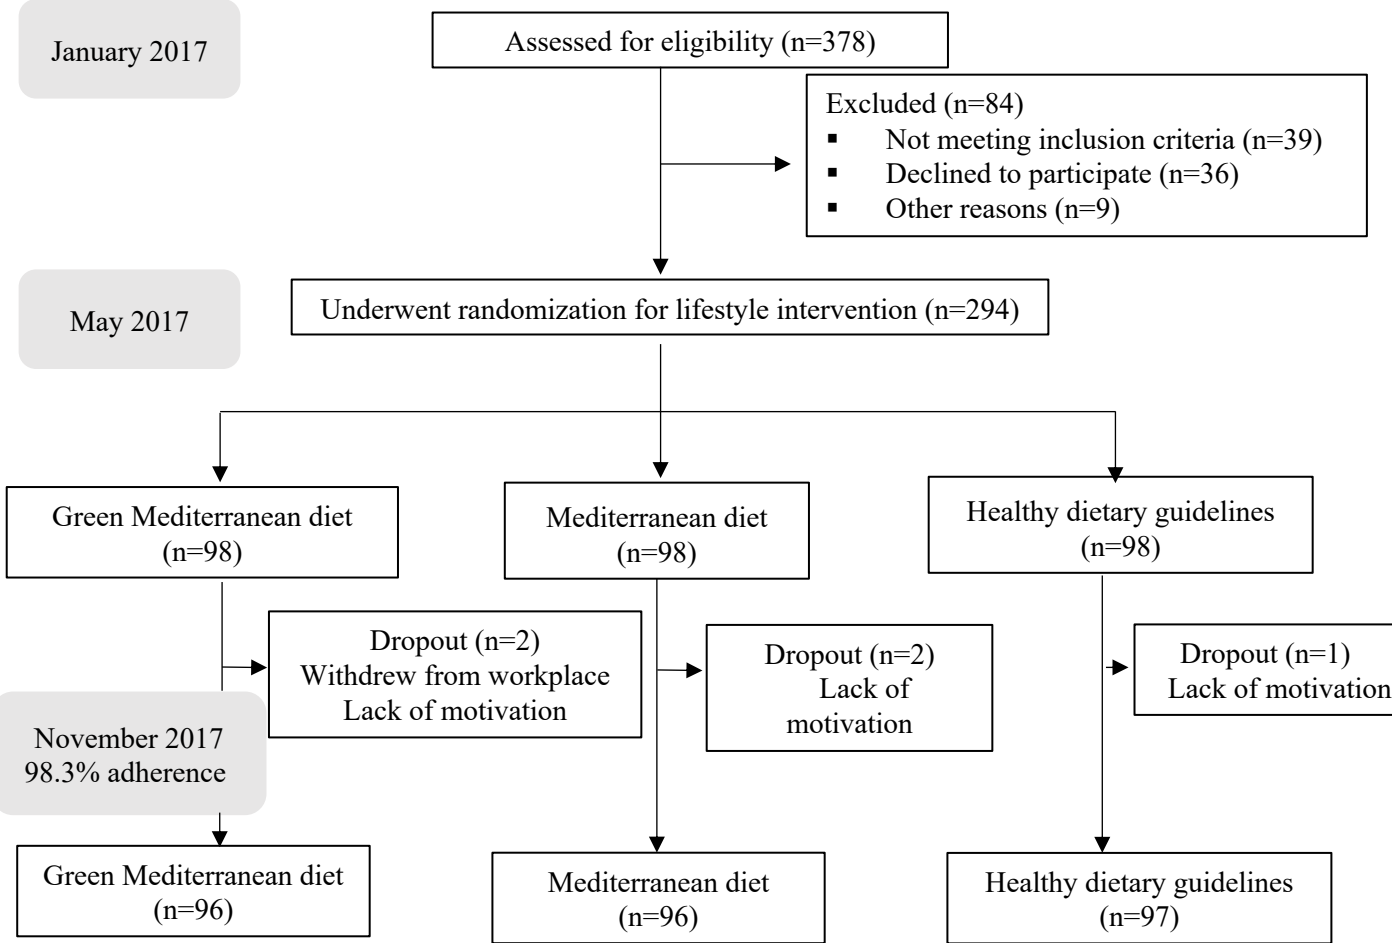

Supplement: 13073_2022_1015_MOESM4_ESM.pdf [file 13073_2022_1015_MOESM4_ESM.pdf]
